# Supplementary material
Source: MDPI journal article supplement (https://www.mdpi.com/2073-4395/13/8/2180)
Supplement: s1 [file s1 › agronomy-2491556-supplementary.pdf]

# **Supplementary Material for: Grassland carbon change in northern China under historical and future land use and land cover change**

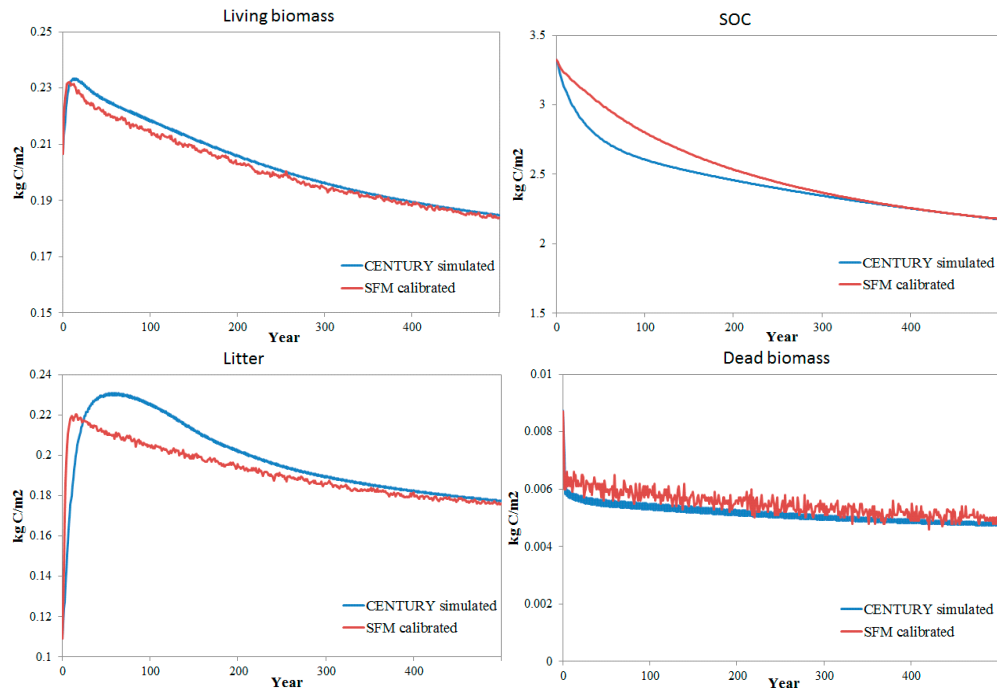

**Figure s1.** Comparison of carbon stock estimated from LUCAS SFM and CENTURY model.

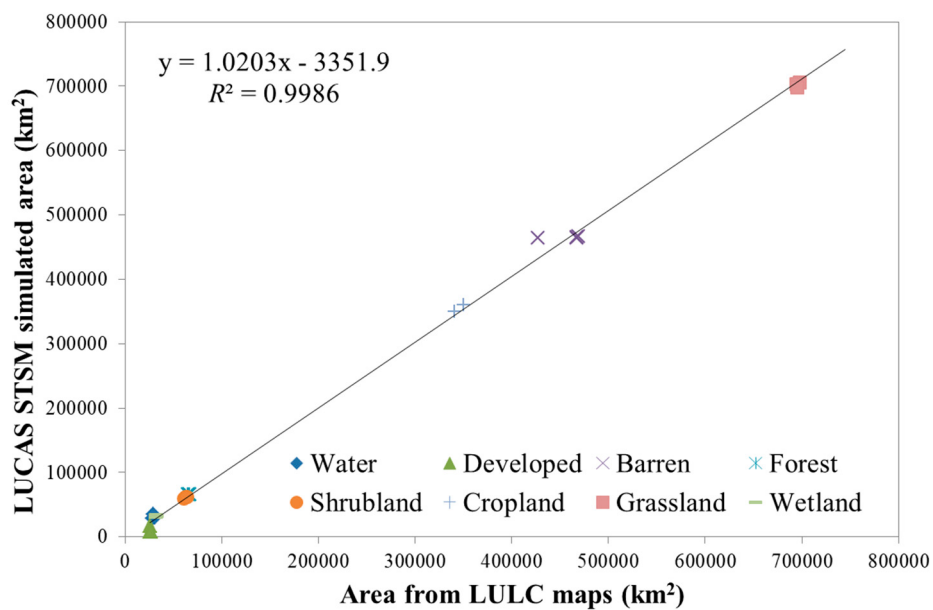

**Figure s2.** Comparison of LULC class area between LUCAS STSM simulations and RESDC LULC maps

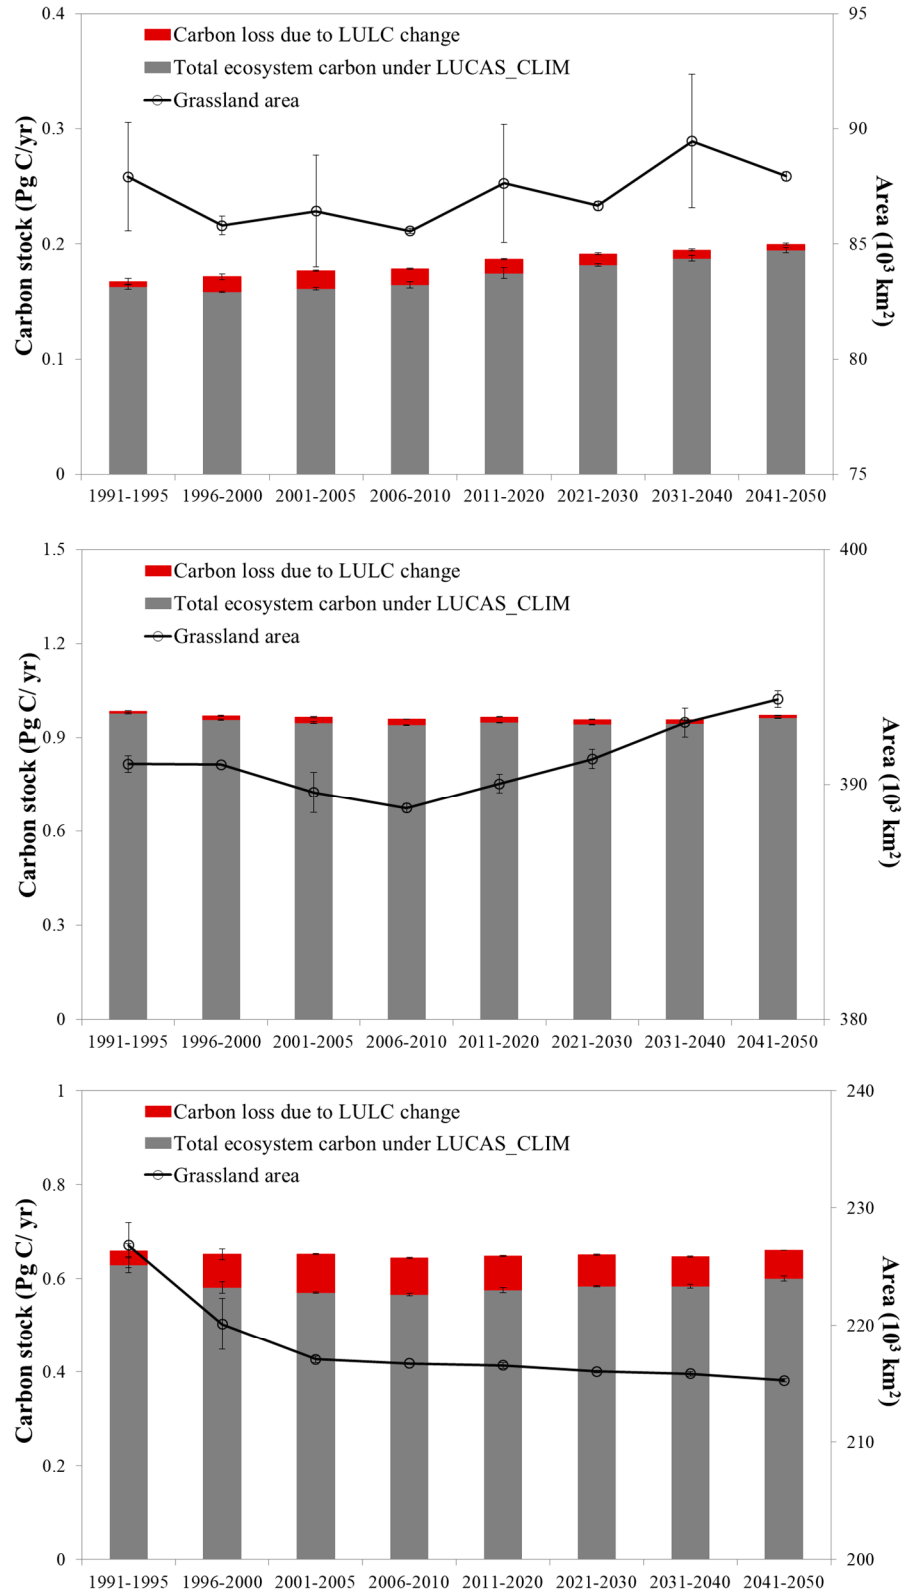

**Figure s3.** Averaged annual grassland carbon loss and grassland area for the three eco-regions from 1991 to 2050 (up: arid area; middle: steppe area; down: ageo-pasture area). Error bar is the standard deviations calculated from the interannual variability of the eco-regions.

**Table s1.** The five transition types and 42 transition pathways used for the LUCAS model.

| Transition type   | Transition pathway       |
|-------------------|--------------------------|
| Grassland gain    | Agriculture to Grassland |
|                   | Barren to Grassland      |
|                   | Developed to Grassland   |
|                   | Forest to Grassland      |
|                   | Shrubland to Grassland   |
|                   | Water to Grassland       |
|                   | Wetland to Grassland     |
| Grassland loss    | Grassland to Agriculture |
|                   | Grassland to Barren      |
|                   | Grassland to Forest      |
|                   | Grassland to Shrubland   |
|                   | Grassland to Water       |
|                   | Grassland to Wetland     |
| Land use change   | Barren to Water          |
|                   | Barren to Wetland        |
|                   | Developed to Barren      |
|                   | Water to Barren          |
|                   | Water to Wetland         |
|                   | Wetland to Barren        |
|                   | Wetland to Water         |
| Urbanization      | Agriculture to Developed |
|                   | Barren to Developed      |
|                   | Grassland to Developed   |
|                   | Water to Developed       |
| Vegetation change | Agriculture to Barren    |
|                   | Agriculture to Forest    |
|                   | Agriculture to Shrubland |
|                   | Agriculture to Water     |
|                   | Agriculture to Wetland   |
|                   | Barren to Agriculture    |
|                   | Barren to Shrubland      |
|                   | Developed to Agriculture |
|                   | Forest to Agriculture    |
|                   | Forest to Shrubland      |
|                   | Forest to Wetland        |
|                   | Shrubland to Agriculture |
|                   | Shrubland to Barren      |

|  |                        |
|--|------------------------|
|  | Shrubland to Forest    |
|  | Water to Agriculture   |
|  | Water to Shrubland     |
|  | Wetland to Agriculture |
|  | Wetland to Forest      |
